# Supplementary material for: Magnetically Recoverable Nanoparticulate Catalysts for Cross-Coupling Reactions: The Dendritic Support Influences the Catalytic Performance
Source: MDPI journal article supplement (doi:10.3390/nano11123345), 2021-12-09
Supplement: s1 [file s1]

# Supporting information

## Magnetically Recoverable Nanoparticulate Catalysts for Cross-Coupling Reactions: The Dendritic Support Influences the Catalytic Performance

Nina V. Kuchkina <sup>1</sup>, Svetlana A. Sorokina <sup>1</sup>, Alexey V. Bykov <sup>2</sup>, Mikhail G. Sulman <sup>2</sup>, Lyudmila M. Bronstein <sup>1,3,4,\*</sup> and Zinaida B. Shifrina <sup>1,\*</sup>

<sup>1</sup> A.N. Nesmeyanov Institute of Organoelement Compounds, Russian Academy of Sciences, 28 Vavilov St., 119991 Moscow, Russia; n\_firsova@yahoo.com (N.V.K.); sorok.svetlana@gmail.com (S.A.S.)

<sup>2</sup> Department of Biotechnology and Chemistry, Tver State Technical University, 22 A. Nikitina St., 170026 Tver, Russia; bykovav@yandex.ru (A.V.B.); sulmanmikhail@yandex.ru (M.G.S.)

<sup>3</sup> Department of Chemistry, Indiana University, 800 E. Kirkwood Av., Bloomington, IN 47405, USA

<sup>4</sup> Department of Physics, Faculty of Science, King Abdulaziz University, P.O. Box 80303, Jeddah 21589, Saudi Arabia

\* Correspondence: lybronst@indiana.edu (L.M.B.); shifrina@ineos.ac.ru (Z.B.S.)

### Experimental

#### *Attachment of G3-PEG to MS (MS-G3-PEG):*

The reaction was carried out under argon in a Schlenk flask, furnished with a reflux condenser and a mechanical stir bar. 4-Dimethylaminopyridine (2.7 mg, 0.02 mmol) was added to the solution of G3-PEG (306.6 mg, 0.026 mmol) in dichloromethane (1 mL). The reaction mixture was stirred for 10 min at room temperature and then 12.4 mg (0.06 mmol) of N,N'-dicyclohexylcarbodiimide dissolved in 0.2 mL of dichloromethane was added. The mixture was stirred at room temperature for additional 40 min. Then 110.8 mg of amino-functionalized magnetic silica MS-NH<sub>2</sub> was added slowly to the prepared mixture and stirred at 40 °C for 32 h. The product was collected from the suspension with a magnet and washed with dichloromethane (100 mL), ethanol (50 mL) and acetone (30 mL) and dried in vacuum. The elemental analysis data, %: C 41.00, N 3.76, H 4.72.

#### *Complexation of Pd (OAc)<sub>2</sub> with MS-G3-PEG (MS-G3-PEG-Pd(OAc)<sub>2</sub>):*

The suspension of MS-G3-PEG (100 mg) in toluene (200 mL) was vigorously stirred and loaded with Pd(OAc)<sub>2</sub> (71.4 mg) in toluene (72 mL). The stirring continued

for 24 h at room temperature. The product was separated from the mixture with a magnet and thoroughly washed with toluene (100 mL), ethanol (100 mL) and dichloromethane (50 mL) and dried at room temperature in vacuum.

*The compounds synthesized via Sonogashira and Heck reactions with MS-G3-PEG-Pd(OAc)<sub>2</sub>:*

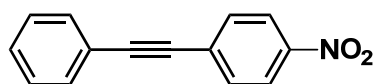

1-Nitro-4-(phenylethynyl)benzene: yellow solid <sup>1</sup>H NMR:  $\delta$  = 8.22 (d,  $J$  = 8.7 Hz, 2H), 7.67 (d,  $J$  = 8.7 Hz, 2H), 7.57–7.55 (m, 2H), 7.41–7.38 (m, 3H) (ppm); <sup>13</sup>C NMR:  $\delta$  = 146.9, 132.3, 131.9, 130.3, 129.3, 128.6, 123.6, 122.1, 94.7, 87.5 (ppm);

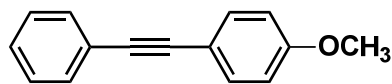

1-Methoxy-4-(phenylethynyl)benzene: white solid <sup>1</sup>H NMR:  $\delta$  = 7.57–7.46 (m, 4H), 7.38–7.30 (m, 3H), 6.89 (d,  $J$ =8.6 Hz, 2H), 3.83 (s, 3H) (ppm); <sup>13</sup>C NMR:  $\delta$  = 159.6, 133.0, 131.5, 128.3, 127.9, 123.6, 115.4, 114.0, 89.4, 88.1, 55.3 (ppm);

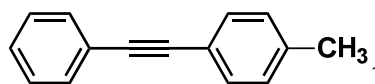

1-Methyl-4-(phenylethynyl)benzene: white solid <sup>1</sup>H NMR:  $\delta$  = 7.54–7.51 (m, 2H), 7.43 (d,  $J$ =8.1 Hz, 2H), 7.37–7.31 (m, 3H), 7.16 (d,  $J$ =7.8 Hz, 2H), 2.37 (s, 3H) (ppm); <sup>13</sup>C NMR:  $\delta$  = 138.4, 132.5, 131.5, 129.1, 128.3, 128.1, 123.5, 120.2, 89.5, 88.7, 21.5 (ppm);

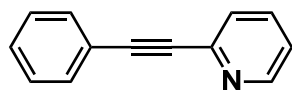

2-(Phenylethynyl)pyridine: brown oil; <sup>1</sup>H NMR:  $\delta$  = 8.55 (d, 1H,  $J$  = 5 Hz), 7.58–7.63 (m, 1H), 7.51–7.55 (m, 2H), 7.46 (d, 1H,  $J$  = 7 Hz), 7.26–7.35 (m, 3H), 7.28–7.23 (m, 1H) (ppm); <sup>13</sup>C NMR:  $\delta$  = 149.7, 143.2, 136.5, 132.1, 129.1, 128.4, 127.2, 122.8, 122.2, 89.9, 88.2 (ppm);

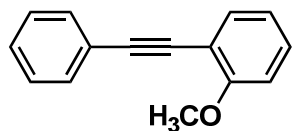

1-Methoxy-2-(2-phenylethynyl)benzene: pale yellow oil; <sup>1</sup>H NMR:  $\delta$  = 7.58–7.54 (m, 2H), 7.50–7.53 (m, 1H), 7.36–7.28 (m, 4H), 6.94–6.91 (m, 1H), 6.90 (d,  $J$  = 7.9 Hz, 1H), 3.91 (s, 3H) (ppm); <sup>13</sup>C NMR:  $\delta$  = 159.9, 133.6, 131.6, 129.7, 128.2, 128.1, 123.5, 120.4, 112.4, 110.6, 93.4, 85.7, 55.8 (ppm);

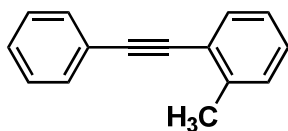

1-Methyl-2-(2-phenylethynyl)benzene: colorless oil;  $^1\text{H}$  NMR:  $\delta$  = 7.62-7.58 (m, 3H), 7.43-7.37 (m, 3H), 7.30-7.29 (m, 2H), 7.25-7.21 (m, 1H), 2.59 (s, 3H) (ppm).  $^{13}\text{C}$  NMR:  $\delta$  = 140.17, 131.84, 131.51, 129.46, 128.35, 128.30, 128.16, 125.58, 123.58, 123.05, 93.37, 88.37, 20.73 (ppm).

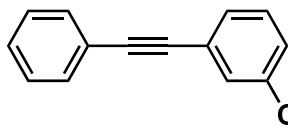

1-Methyl-3-(2-phenylethynyl)benzene: yellow solid;  $^1\text{H}$  NMR:  $\delta$  = 7.58-7.55 (m, 2 H), 7.40-7.36 (m, 5 H), 7.28-7.25 (m, 1 H), 7.18-7.17 (m, 1 H), 2.38 (s, 3 H) (ppm).  $^{13}\text{C}$  NMR:  $\delta$  = 138.0, 132.2, 131.6, 129.2, 128.7, 128.3, 128.3, 128.2, 123.4, 123.1, 89.6, 89.1, 21.3 (ppm).

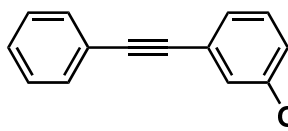

1-Methoxy-3-(2-phenylethynyl)benzene: yellow solid;  $^1\text{H}$  NMR:  $\delta$  = 7.62-7.60 (m, 2H), 7.43-7.39 (m, 3H), 7.33-7.32 (m, 1H), 7.22-7.20 (d, 1H), 7.14 (s, 1H), 6.97-6.94 (m, 1H), 3.86 (s, 3H) (ppm);  $^{13}\text{C}$  NMR:  $\delta$  = 159.43, 131.70, 129.49, 128.43, 124.33, 124.25, 123.26, 116.42, 115.00, 89.42, 89.29, 55.30 (ppm).

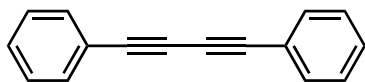

1,4-Diphenylbuta-1,3-diyne: white solid,  $^1\text{H}$  NMR:  $\delta$  = 7.58-7.50 (m, 4H), 7.42-7.30 (m, 6H) (ppm);  $^{13}\text{C}$  NMR  $\delta$  = 132.52, 129.24, 128.46, 121.81, 81.58, 73.92 (ppm);

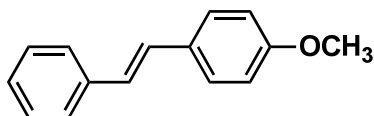

1-Methoxy-4-styrylbenzene: white solid;  $^1\text{H}$  NMR:  $\delta$  = 7.42 (d, 2H,  $J$  = 7.5 Hz), 7.37 (d, 2H,  $J$  = 8.5 Hz), 7.28 (t, 2H,  $J$  = 7.5 Hz), 7.18 (t, 1H,  $J$  = 6.5 Hz), 6.99 (d, 1H,  $J$  = 16.0 Hz), 6.89 (d, 1H,  $J$  = 16.5 Hz), 6.80 (d, 2H,  $J$  = 8.5 Hz), 3.77 (s, 3H) (ppm).  $^{13}\text{C}$  NMR:  $\delta$  = 160.5, 138.8, 130.9, 129.5, 128.0, 127.5, 127.0, 126.5, 126.0, 116.5, 57.5 (ppm).

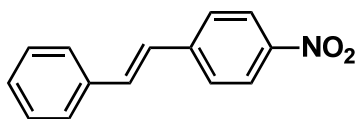

1-Nitro-4-styrylbenzene: white solid;  $^1\text{H}$  NMR:  $\delta$  = 8.22-8.23 (d,  $J$  = 8.4 Hz, 2H), 7.63-7.64 (d,  $J$  = 9.0 Hz, 2H), 7.55-7.57 (d,  $J$  = 7.2 Hz, 2H), 7.40-7.42 (t,  $J$  =

7.8 Hz, 2H), 7.33-7.36 (t, J = 7.8 Hz, 1H), 7.26-7.29 (d, J = 16.2 Hz, 1H), 7.16 (d, J = 16.2 Hz, 1H) (ppm).  $^{13}\text{C}$  NMR:  $\delta$  = 146.9, 144.0, 136.3, 133.4, 127.2, 127.0, 126.4, 124.3 (ppm).

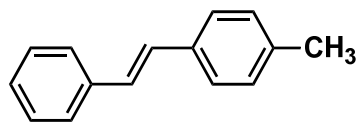

1-Methyl-4-styrylbenzene: white solid;  $^1\text{H}$  NMR:  $\delta$  7.55-7.14 (9H, m), 5.43 (d, J = 16.8 Hz, 1H), 5.42 (d, J = 16.8 Hz, 1H), 2.38 (3H, s) (ppm)

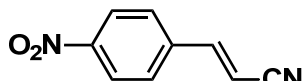

3-(4-Nitrophenyl)acrylonitrile: yellow solid  $^1\text{H}$  NMR:  $\delta$  = 8.06 (d, J = 8.7 Hz, 2 H), 7.57 (d, J = 8.8 Hz, 2 H), 7.20 (d, J = 16.8 Hz, 1 H), 5.84 (d, J = 16.8 Hz, 1 H) (ppm);  $^{13}\text{C}$  NMR:  $\delta$  = 148.2, 147.1, 132.4, 127.6, 127.0, 118.7, 95.6 (ppm)

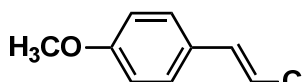

3-(4-Methoxyphenyl)acrylonitrile: yellow oil;  $^1\text{H}$  NMR:  $\delta$  = 7.29–7.25 (m, 3 H), 6.84 (d, J = 8.2 Hz, 2 H), 5.65 (d, J = 16.5 Hz, 1 H), 3.77 (s, 3 H) (ppm);  $^{13}\text{C}$  NMR:  $\delta$  = 162.06, 150.00, 129.05, 126.37, 118.64, 114.52, 93.40, 55.43 (ppm);

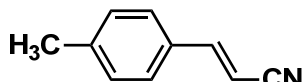

3-(4-Methylphenyl)acrylonitrile  $^1\text{H}$  NMR:  $\delta$  = 7.24–7.18 (m, 5 H), 5.74 (d, J = 16.7 Hz, 1 H), 2.30 (s, 3 H) (ppm);  $^{13}\text{C}$  NMR:  $\delta$  = 150.6, 141.5, 130.2, 129.6, 127.1, 118.2, 95.1, 21.4 (ppm).

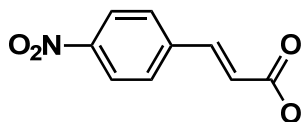

Methyl-3-(4-nitrophenyl)acrylate: white solid;  $^1\text{H}$  NMR:  $\delta$  = 8.25 (d, J = 8.8 Hz, 2H), 7.72 (d, J = 16.1 Hz, 1H), 7.67 (d, J = 8.7 Hz, 2H), 6.56 (d, J = 16.1 Hz, 1H), 3.84 (s, 3H) (ppm).  $^{13}\text{C}$  NMR:  $\delta$  = 166.6, 148.7, 142.1, 140.7, 128.8, 124.4, 122.3, 52.3 (ppm).

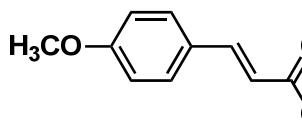

Methyl-3-(4-methoxyphenyl)acrylate: yellow solid;  $^1\text{H}$  NMR:  $\delta$  = 7.67 (d, J = 16 Hz, 1H), 7.50-7.47 (m, 2H), 6.94-6.90 (m, 2H), 6.33 (d, J = 16 Hz, 1H), 3.85 (s, 3H), 3.81 (s, 3H) (ppm).  $^{13}\text{C}$  NMR:  $\delta$  = 167.8, 161.4, 144.6, 129.8, 127.2, 115.3, 114.4, 55.4, 51.6 (ppm)

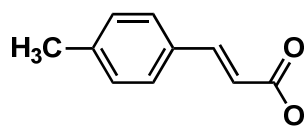

Methyl-3-(p-tolyl)acrylate: white solid;  $^1\text{H}$  NMR:  $\delta$  = 7.69 (d,  $J$  = 16 Hz, 1H), 7.43 (d,  $J$  = 8 Hz, 2H), 7.20 (d,  $J$  = 8 Hz, 2H), 6.41 (d,  $J$  = 16 Hz, 1H), 3.81 (s, 3H), 2.38 (s, 3H) (ppm).  $^{13}\text{C}$  NMR:  $\delta$  = 167.6, 144.8, 140.7, 131.6, 129.6, 128.0, 116.7, 51.6, 21.4 (ppm).

### Characterization:

TGA measurements were performed by placing ~2-5 mg of the sample in platinum pans and heating to 700°C at a rate of 10.0 °/min using Shimadzu DTG-60H (Shimadzu GmbH, Kyoto, Japan).

Mass spectral analyzes were carried out on the Bruker Biflex III MALDI-TOF instrument (Bruker, Billerica, MA, USA). MALDI-TOF mass spectra were measured by using a 337 nm nitrogen laser and tetracyanoquinodimethane (TCNQ) (Sigma-Aldrich, St.Louis, MO, USA) as a matrix.

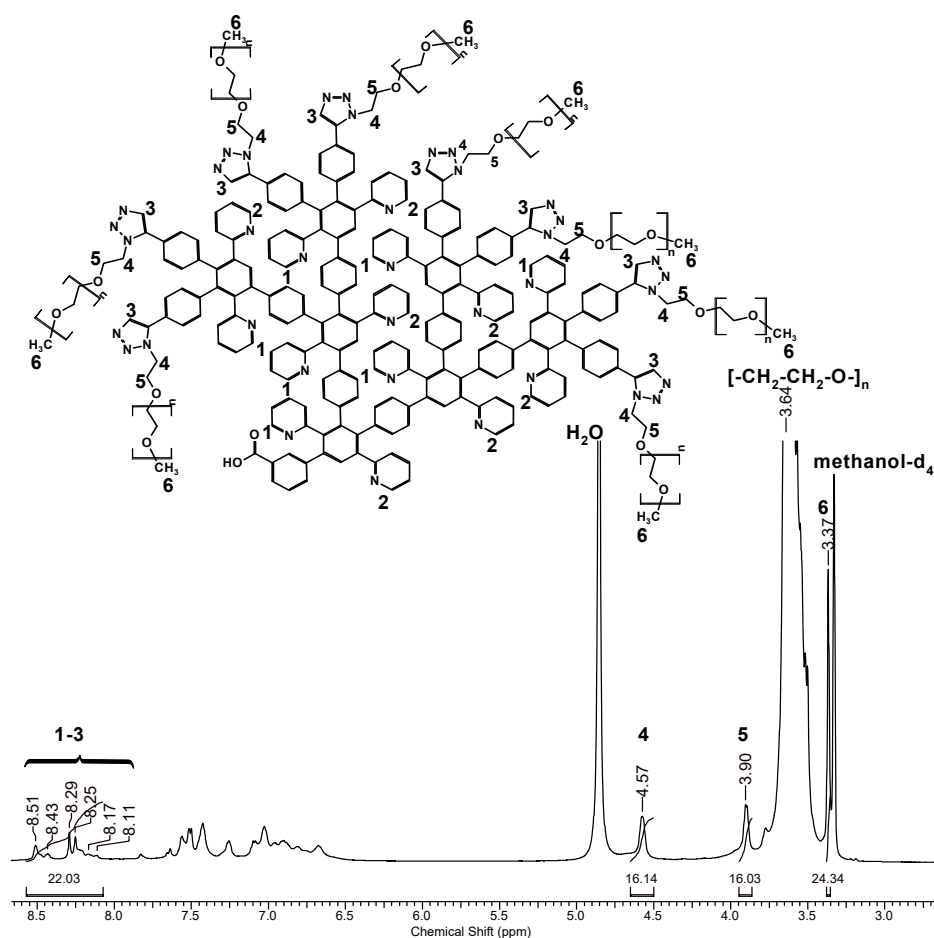

**Figure S1.**  $^1\text{H}$  NMR of PEGylated G3.

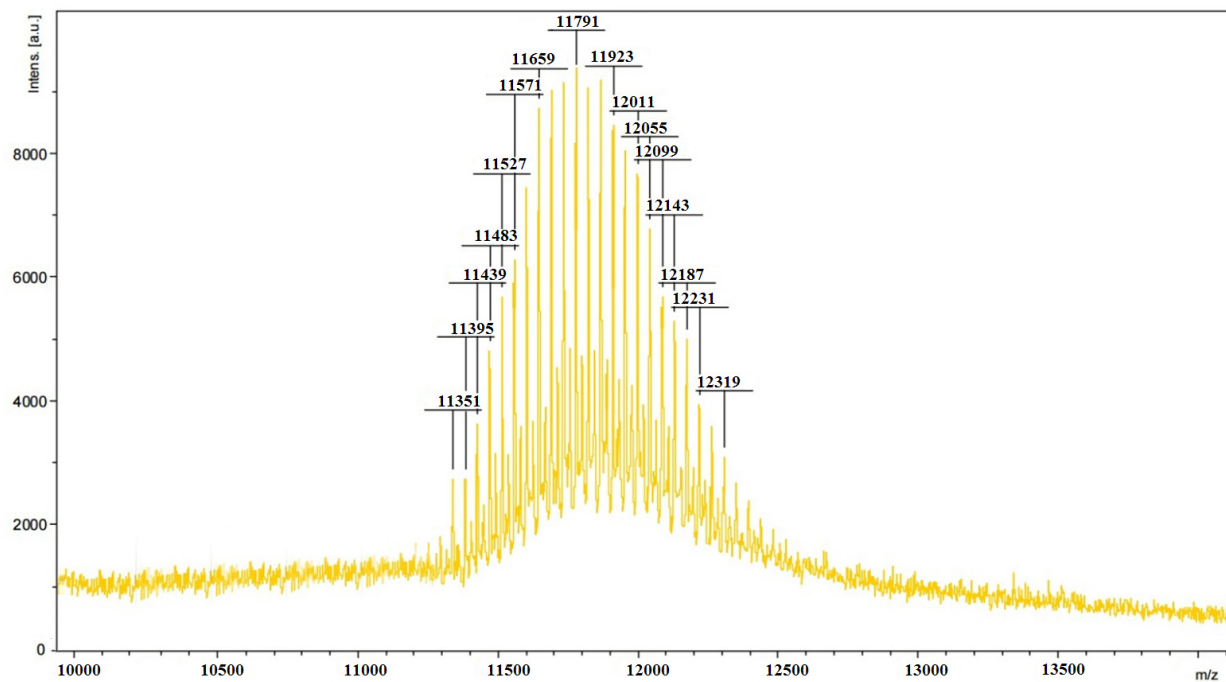

Figure S2. MALDI ToF of PEGylated G3.

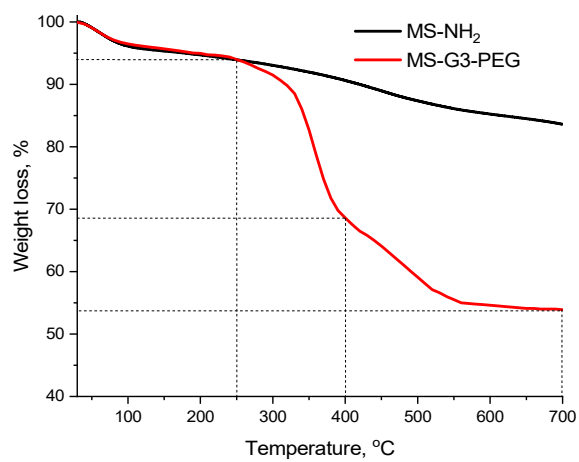

Figure S3. TGA of MS-NH<sub>2</sub> and MS-G3-PEG.

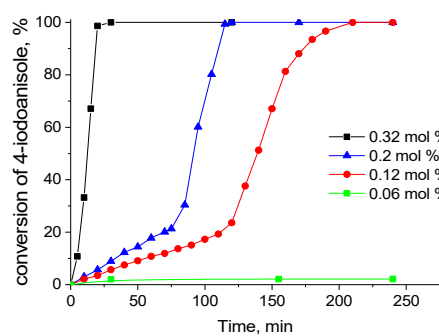

(a)

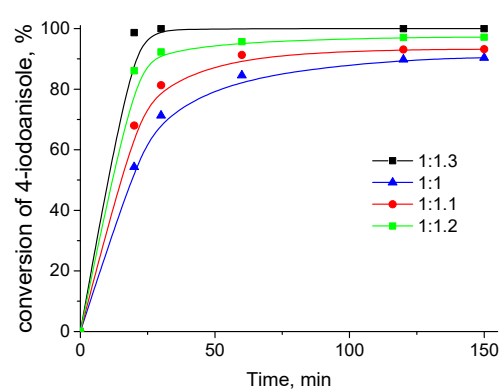

(b)

**Figure S4.** Effect of the Pd loading (a) and the phenylacetylene molar ratio at the Pd loading of 0.32 mol % (b) on the reaction conversion.

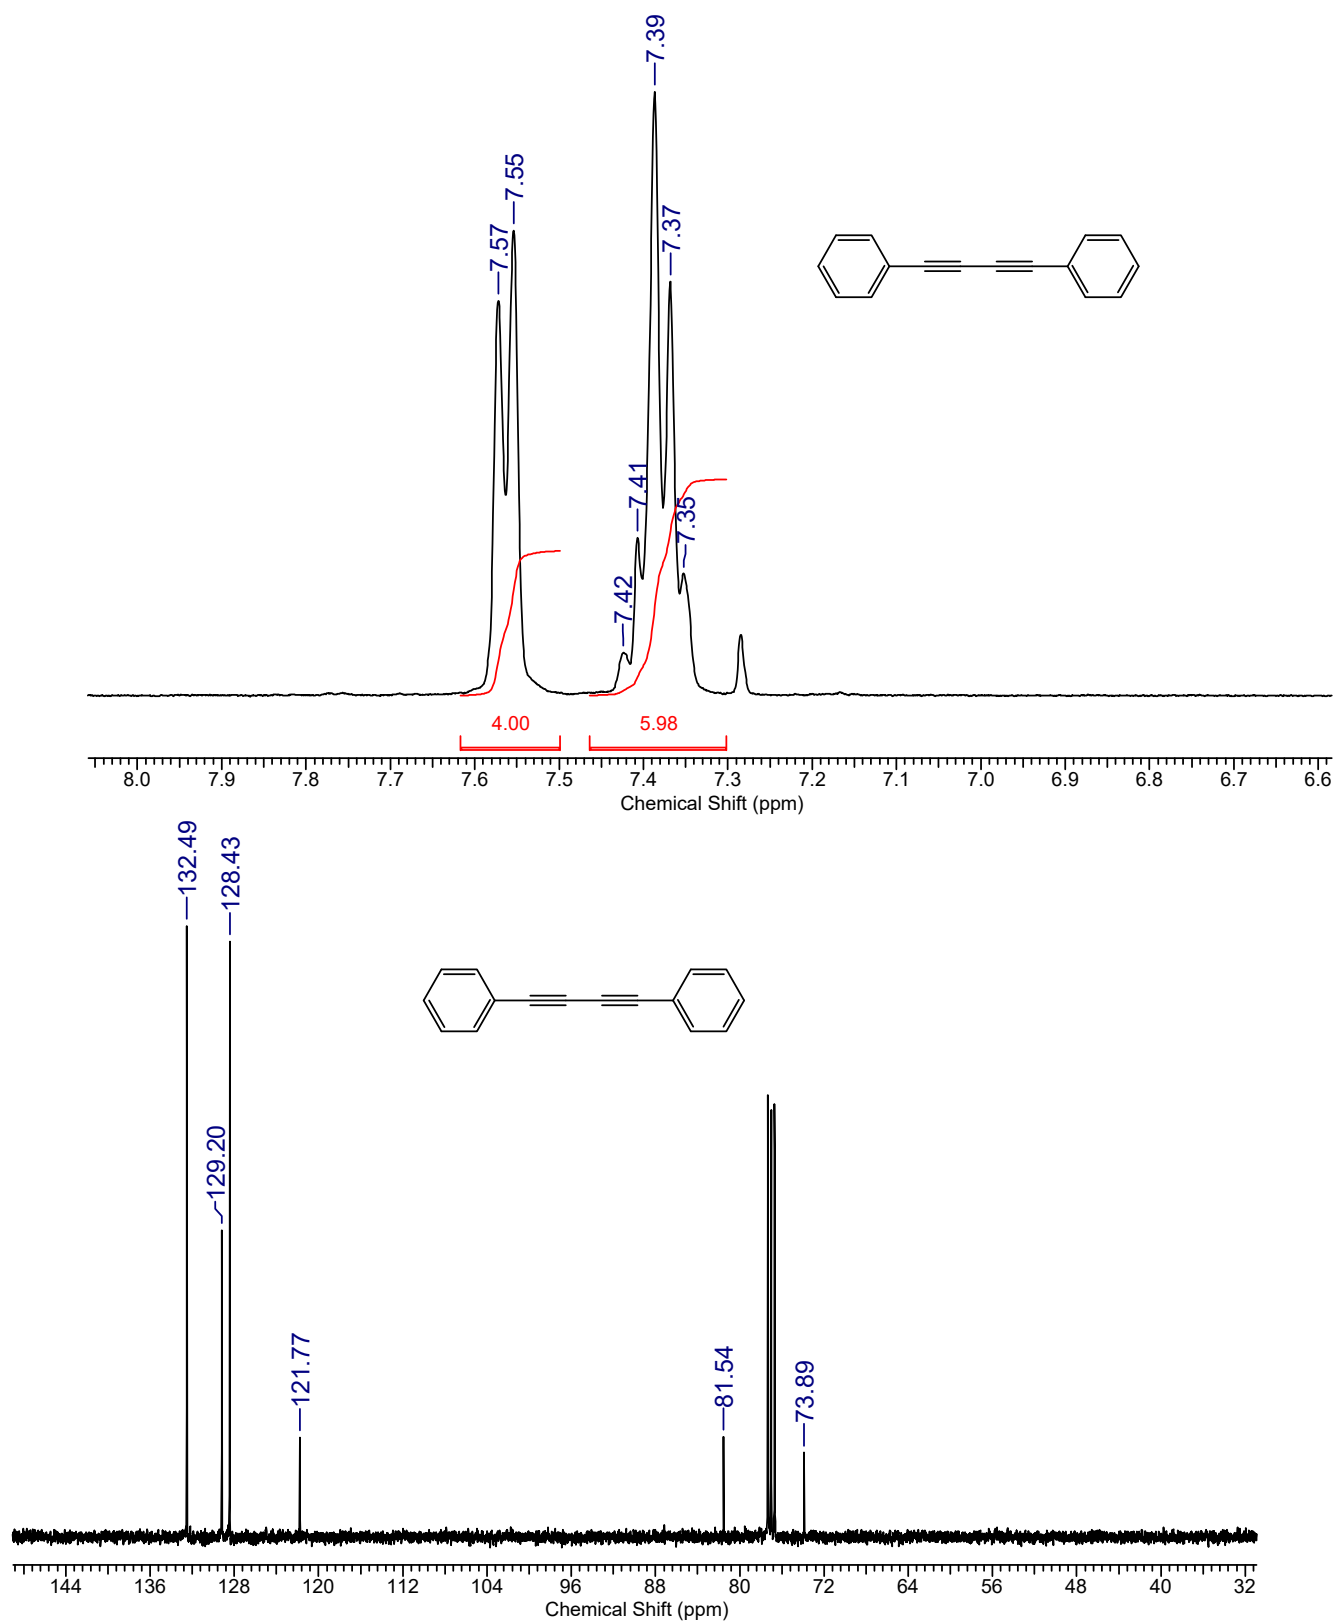

**Figure S5.**  $^1\text{H}$  NMR and  $^{13}\text{C}$  NMR of 1,4-diphenylbuta-1,3-diyne.



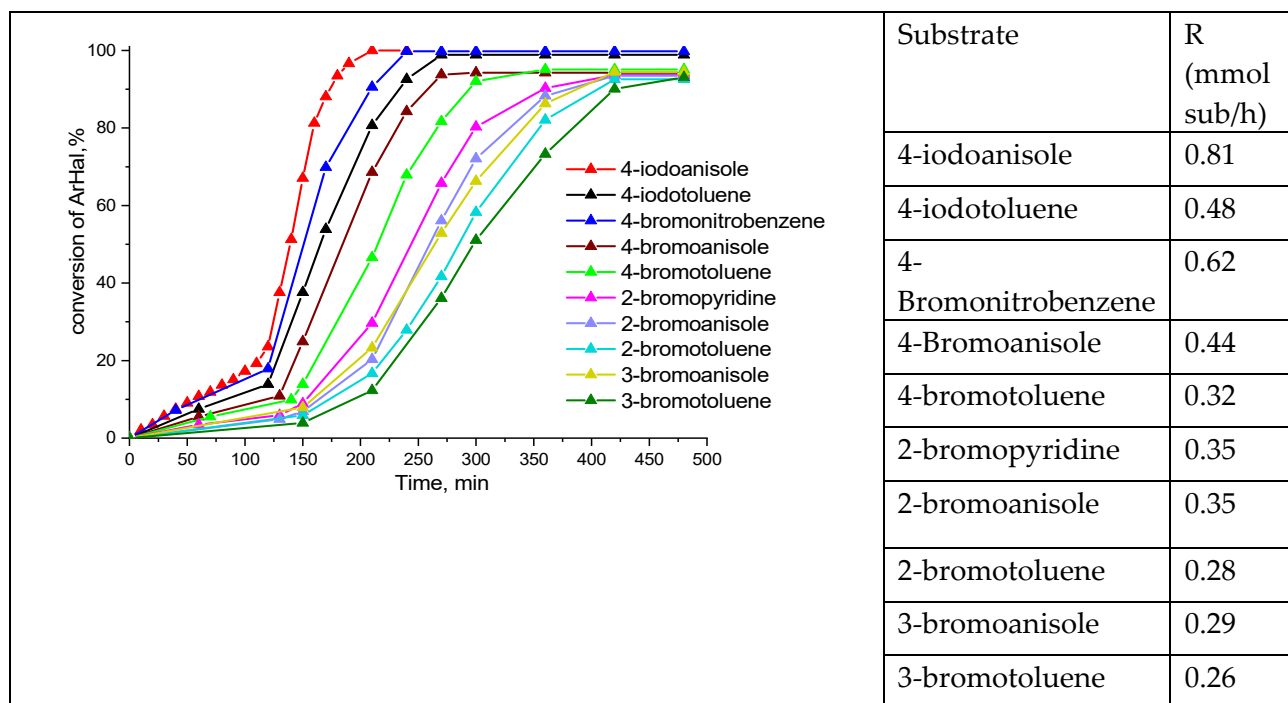

**Figure S6.** Kinetic curves and apparent rates for intermediate conversions (after an induction period) for different substrates at the Pd loading of 0.12 mol % for the Sonogashira reaction.

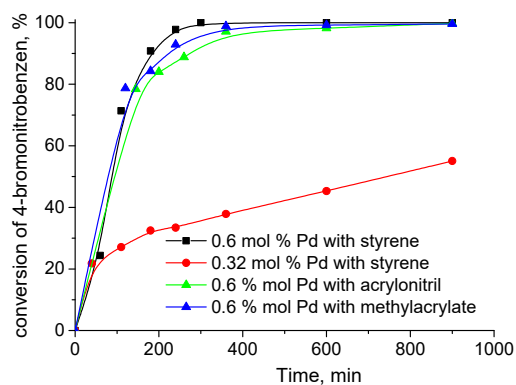

(a)

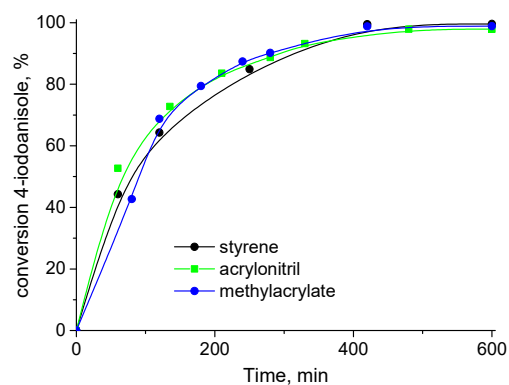

(b)

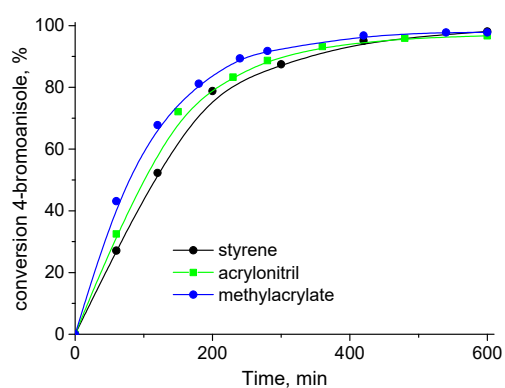

(c)

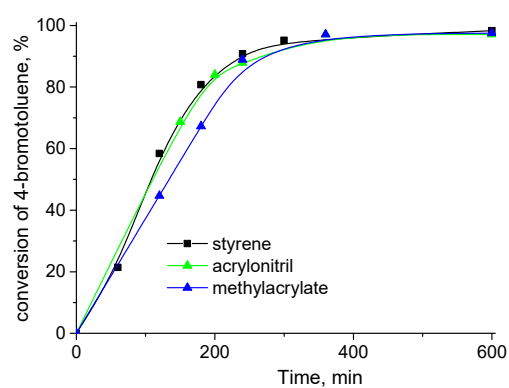

(d)

**Figure S7.** Kinetic curves for Heck coupling of different substrates: (a) 4-bromonitrobenzene, (b) 4-iodoanisole, (c) 4-bromoanisole, (d) 4-bromotoluene

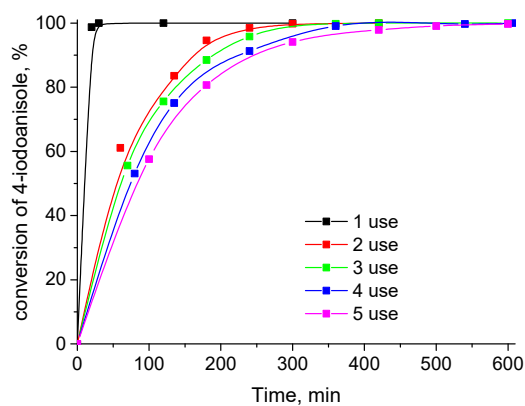

**Figure S8.** Kinetic curves for five consecutive catalytic cycles for Sonogashira coupling of 4-iodoanisole with phenylacetylene. In all cases, Pd loading is 0.32 mol % with respect to 4-iodoanisole.

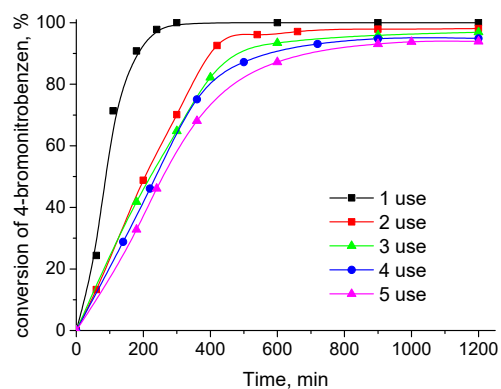

**Figure S9.** Kinetic curves for five consecutive catalytic cycles for Heck coupling of 4-bromonitrobenzene with styrene. In all cases, Pd loading is 0.6 mol % with respect to 4-bromonitrobenzene.

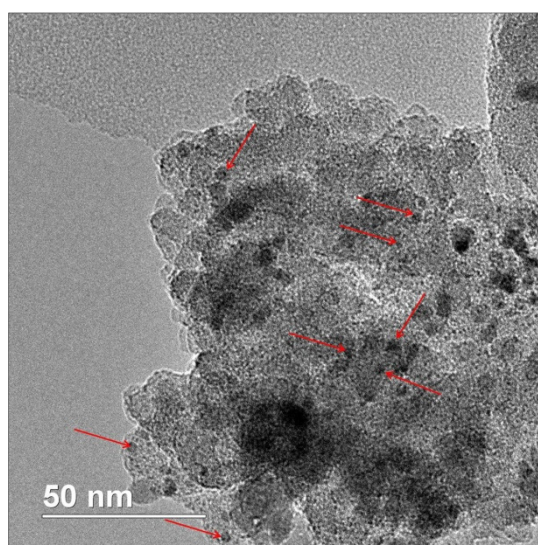

**Figure S10.** TEM image of MS-G3-PEG- Pd(OAc)<sub>2</sub> after the first cycle of Heck coupling.

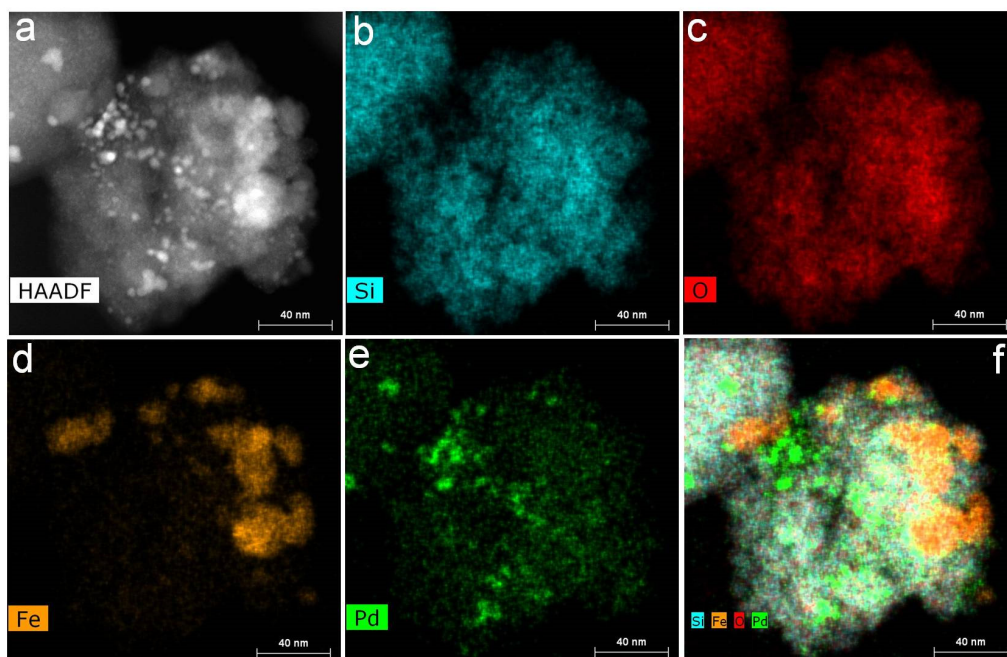

**Figure S11.** STEM dark-field image (a) and EDS maps for Si (b), O (c), Fe (d), and Pd (e) and their superposition (f) for MS-G3-PEG- Pd(OAc)<sub>2</sub> after the first catalytic cycle of Heck coupling.

**Table S1.** Fitting parameters for HR XPS Pd3d of MS-G3-PEG- Pd(OAc)<sub>2</sub>.

| Band | Position,<br>eV | FWHM,<br>eV | %Gauss | %Area | Chi Squared |
|------|-----------------|-------------|--------|-------|-------------|
| 1    | 335.8           | 2.34        | 90     | 22.40 | 1.51        |
| 2    | 337.73          | 2.57        | 90     | 37.67 |             |
| 3    | 341.06          | 2.43        | 90     | 14.89 |             |
| 4    | 342.99          | 2.68        | 90     | 25.04 |             |

**Table S2.** Fitting parameters for HR XPS Pd3d of MS-G3-PEG- Pd(OAc)<sub>2</sub> after the first catalytic reaction.

| Band | Position,<br>eV | FWHM,<br>eV | %Gauss | %Area | Chi Squared |
|------|-----------------|-------------|--------|-------|-------------|
| 1    | 335.12          | 2.26        | 90     | 28.64 | 1.62        |
| 2    | 337.59          | 2.86        | 90     | 31.60 |             |
| 3    | 340.32          | 2.31        | 90     | 18.90 |             |
| 4    | 342.85          | 2.94        | 90     | 20.86 |             |
